# Supplementary material for: Beryllium dinitride monolayer: a multifunctional direct bandgap anisotropic semiconductor containing polymeric nitrogen with oxygen reduction catalysis and potassium-ion storage capability
Source: Royal Society of Chemistry journal article supplement (doi:10.1039/d4ta08565e), 2025-01-01
Supplement: d4ta08565e1.pdf [file d4ta08565e1.pdf]

## Electronic Supplementary Information

# Beryllium Dinitride Monolayer: A Multifunctional Direct Bandgap Anisotropic Semiconductor with Polymeric Nitrogen, Oxygen Reduction Catalysis, and Potassium Ion Storage Ability

Shuang Ni,<sup>‡a</sup> Jiaxin Jiang,<sup>‡b</sup> Weiyi Wang,<sup>c</sup> Xiaojun Wu,<sup>c</sup> Zhiwen Zhuo,<sup>\*c</sup> and Zhuo Wang<sup>\*a</sup>

<sup>a</sup> Research Center of Laser Fusion, China Academy of Engineering Physics, Mianyang, People's Republic of China.

<sup>b</sup> Anhui Province Key Laboratory of Optoelectric Materials Science and Technology, Key Laboratory of Functional Molecular Solids Ministry of Education, and Department of Physics, Anhui Normal University, Wuhu, Anhui, People's Republic of China.

<sup>c</sup> Hefei National Research Center for Physical Sciences at the Microscale, University of Science and Technology of China, 96 Jinzhai Rd., Hefei, People's Republic of China.

### Calculation of formation energy of $\alpha$ -2D-BeN<sub>2</sub>

The formation energy of  $\alpha$ -2D-BeN<sub>2</sub> is calculated as:

$$E_{f-BeN_2} = \frac{E_{BeN_2} - E_{Be} - E_{N_2}}{3} \#(Eq S1)$$

where  $E_{BeN_2}$ ,  $E_{Be}$ , and  $E_{N_2}$  are the energy of  $\alpha$ -2D-BeN<sub>2</sub>, Be atom in its bulk metal and N<sub>2</sub> molecule, respectively.

### Calculation of the interlayer binding energy of the freestanding bilayers

The interlayer binding energy of the freestanding bilayers is calculated as:

$$E_{bind} = \frac{E_{bi} - 2E_{mono}}{S} \#(Eq S2)$$

where  $E_{bi}$ ,  $E_{mono}$  and  $S$  are the total energy of the bilayer, total energy of each monolayer, and the area of bilayer structure, respectively.

### Calculation of Young's stiffness and Poisson's ratio

The in-plane Young's stiffness  $Y(\theta)$  and Poisson's ratio  $\nu(\theta)$  are calculated as functions of  $\theta$  based on the equations as listed below <sup>1</sup>:

$$Y(\theta) = \frac{C_{11}C_{22} - C_{12}^2}{C_{11}\sin^4\theta + C_{22}\cos^4\theta + \left(\frac{C_{11}C_{22} - C_{12}^2}{C_{66}} - 2C_{12}\right)\cos^2\theta\sin^2\theta} \#(Eq S3)$$

$$\nu(\theta) = \frac{\left(C_{11} + C_{12} - \frac{C_{11}C_{22} - C_{12}^2}{C_{66}}\right)\cos^2\theta\sin^2\theta - C_{12}\sin^4\theta - C_{12}\cos^4\theta}{C_{11}\sin^4\theta + C_{22}\cos^4\theta + \left(\frac{C_{11}C_{22} - C_{12}^2}{C_{66}} - 2C_{12}\right)\cos^2\theta\sin^4\theta} \#(Eq S4)$$

### Calculation of carrier mobility

According to the DP theory <sup>2</sup>, the carrier mobility of a 2D structure is calculated as:

$$\mu_{2D} = \frac{e\hbar^3 C_{2D}}{k_B T m^* m_d (E_1)^2} \#(Eq S5)$$

where  $e$ ,  $\hbar$ , and  $k_B$  are the electron charge, reduced Planck constant, and Boltzmann constant, respectively.  $C_{2D}$  are the elastic moduli, T is the temperature (300 K),  $m^*$  is

the effective mass along the transport direction, which can be obtained by fitting the band structure at the CBM and VBM, and  $m_d = \sqrt{m_x^* m_y^*}$  is the average effective mass.

$E_l$  is the deformation potential constant, which is the key to the magnitude of mobility,

defined by  $E_l = \partial E_{edge} / \partial \varepsilon$ , where  $E_{edge}$  is the energy of the band edge and  $\varepsilon = \Delta l / l_0$ .

The strain range is from -0.6% to +0.6% with an interval of 0.2%. This method has been widely applied in many monolayers<sup>3-6</sup>.

### Calculation of optical absorption.

According to the frequency-dependent permittivity of  $\varepsilon(\omega) = \varepsilon_1(\omega) + i\varepsilon_2(\omega)$ , the absorption coefficient was obtained based on the following equation<sup>7,8</sup>:

$$\alpha(\omega) = \frac{\sqrt{2}\omega}{c} \left[ \sqrt{\varepsilon_1^2(\omega) + \varepsilon_2^2(\omega)} - \varepsilon_1(\omega) \right]^{1/2} \# (Eq S6)$$

### Calculation of free energy changes for the oxygen reduction/evolution reaction (ORR/OER)

The ORR and OER follow the associative mechanism pathways, as equation below:

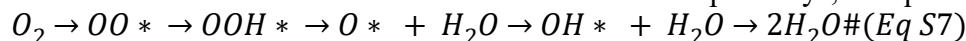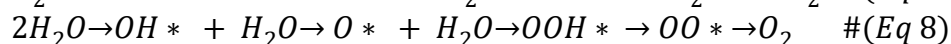

where, the \* is the  $\alpha$ -2D-BeN<sub>2</sub>.

To study the catalytic capabilities of  $\alpha$ -2D-BeN<sub>2</sub>, we employed a supercell combined with the computational hydrogen electrode (CHE) methodology<sup>9</sup>. The free energy ( $\Delta G$ ) of electrochemical reaction is expressed as:

$$\Delta G = \Delta E + \Delta E_{ZPE} - \Delta TS + \Delta G_{pH} + \Delta G_U \# (Eq S9)$$

where,  $\Delta E$  represents the reaction energy;  $E_{ZPE}$  and  $S$  respectively denote zero-point energy and entropy. The influences of pH and electrode potential ( $U$ ) can be calculated by the equation as:  $\Delta G_{pH} = 0.0592 \times \text{pH}$  and  $\Delta G = -eU$ . In this study, the temperature ( $T$ ) for the system is 298.15 K, and pH is 0 at an electrode potential ( $U$ ) of 0 V. The limiting potential of ORR ( $U_{L,ORR}$ ) is defined as the minimum value among ( $-\Delta G_1$ ,  $-\Delta G_2$ ,  $-\Delta G_3$ ,  $-\Delta G_4$ ). The limiting potential of OER ( $U_{L,OER}$ ) is defined as the maximum value among ( $\Delta G_1$ ,  $\Delta G_2$ ,  $\Delta G_3$ ,  $\Delta G_4$ ). The  $E_{ZPE}/-TS$  of H<sub>2</sub> and H<sub>2</sub>O(l) are 0.28/-0.404 eV and 0.68/-0.216 eV at 298.15 K and 1 atm obtained from the NIST database,<sup>10</sup> and the Gibbs free energy of H<sub>2</sub> and H<sub>2</sub>O(l) are calculated as -14.52 eV and -6.90 eV, respectively.

### Calculation details of K-ion storage performances

The adsorption energy ( $E_{ads}$ ) was calculated as following:

$$E_{ads} = E_{K@ \alpha - 2D - BeN_2} - E_{\alpha - 2D - BeN_2} - E_K \# (Eq S10)$$

where  $E_{K@α-2D-BeN_2}$  and  $E_{α-2D-BeN_2}$  are total energy of adsorbed and bare  $α-2D-BeN_2$ , respectively.  $E_K$  is the energy of a K atom in K metal bulk.

The formation energy ( $E_f$ ) is calculated by the following equation:

$$E_f = \frac{E_{K_xBeN_2} - xE_K - E_{BeN_2}}{x + 1} \#(Eq S11)$$

where  $E_{K_xBeN_2}$  represents the energy of the system with x K ions.

The average stepwise adsorption energy ( $E_{step}$ ) was calculated as following:

$$E_{step} = \frac{E_{K_nBeN_2} - E_{K_mBeN_2}}{n - m} - E_K \#(Eq S12)$$

where  $E_{K_nBeN_2}$  and  $E_{K_mBeN_2}$  are total energy of  $α-2D-BeN_2$  with n and m K ions, respectively.

The maximum specific capacities ( $C_M$ ) is estimated using the following formula:

$$C_M = \frac{cxF}{m_{α-2D-BeN_2}} \# (Eq S13)$$

where c is the number of valence electrons (c = 1 for K), x is the number of K ions adsorbed per formula unit, F is the Faraday constant (26801 mAh·mol<sup>-1</sup>), and  $m_{α-2D-BeN_2}$  is the molar weight of chemical formula  $BeN_2$ .

The open-circuit voltage (VOC) of these stable systems can then be calculated using the following formula:

$$V_{OC} = -\frac{E_{step}}{e} \#(Eq S14)$$

where the  $E_{step}$  is the average stepwise adsorption energy between the stable adsorption conformers and e is the elementary charge.

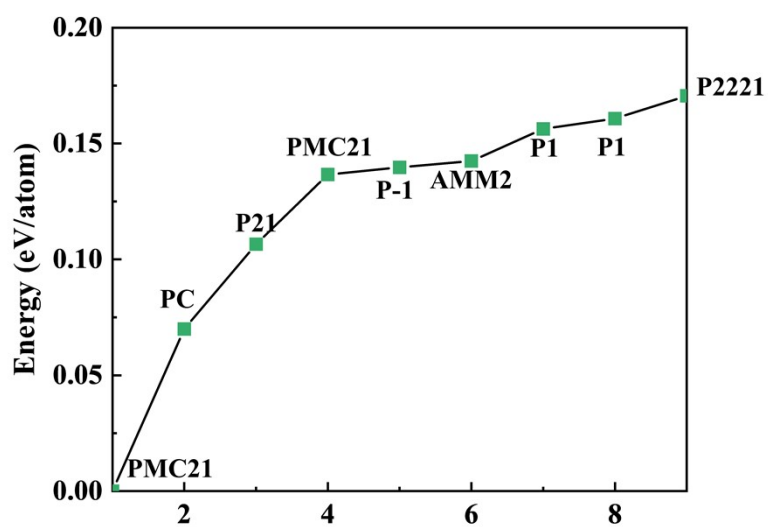

**Fig. S1.** The energy difference between  $\alpha$ -2D-BeN<sub>2</sub> and 2D isomers of BeN<sub>2</sub>, which are found by the CALYPSO code with atom number set as Be : N = 4 : 8.

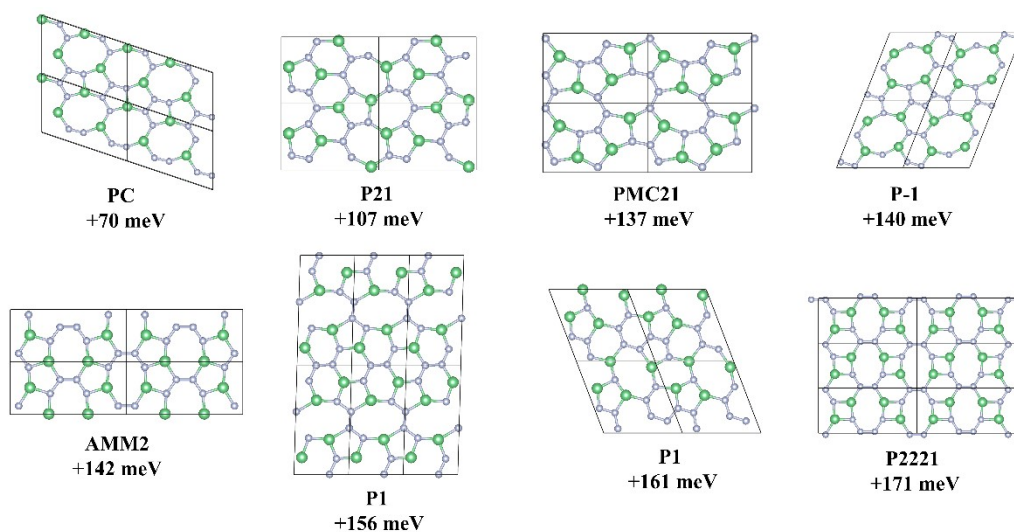

**Fig. S2.** The  $\alpha$ -2D-BeN<sub>2</sub> and isomers of 2D BeN<sub>2</sub> found by the CALYPSO structure search code, where the number indicate the energy difference based on  $\alpha$ -2D-BeN<sub>2</sub> as a reference.

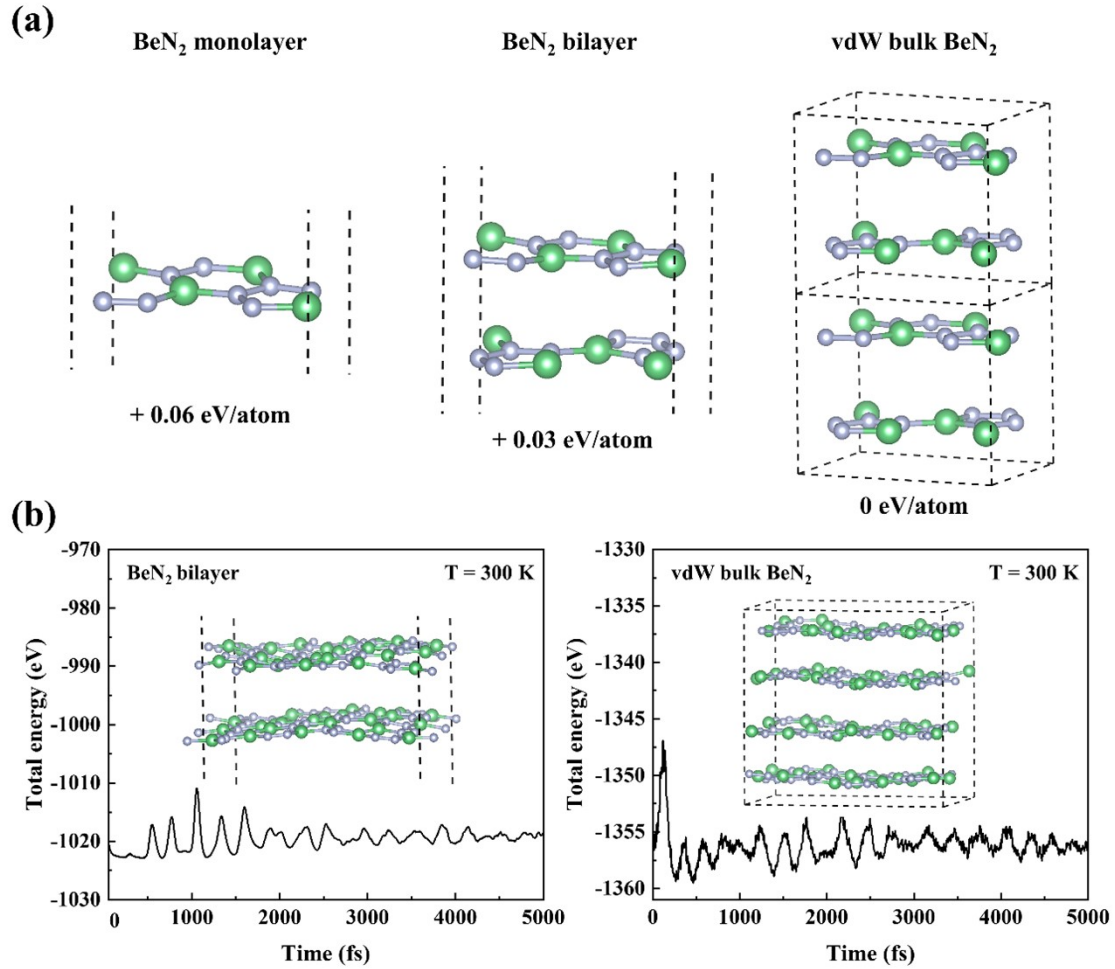

**Fig. S3.** (a) Structural configurations and relative energies (vs. vdW bulk BeN<sub>2</sub>) of  $\alpha$ -2D-BeN<sub>2</sub> monolayer, bilayer, and bulk phases. (b) the changes in total energy of  $\alpha$ -2D-BeN<sub>2</sub> bilayer, and vdW bulk BeN<sub>2</sub>, along with structural snapshots after the 5 ps AIMD simulations at 300 K. The supercell used in the AIMD simulation is  $2 \times 3 \times 1$ , and  $2 \times 2 \times 2$ , respectively.

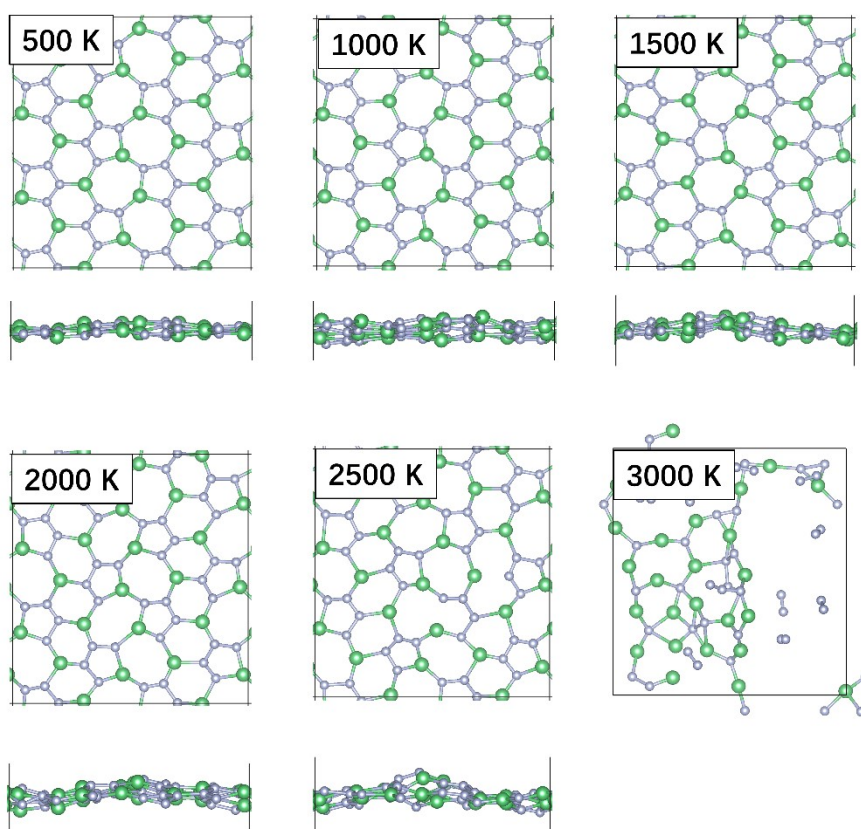

**Fig. S4.** The snapshots of  $\alpha$ -2D-BeN<sub>2</sub> structures after AIMD simulations

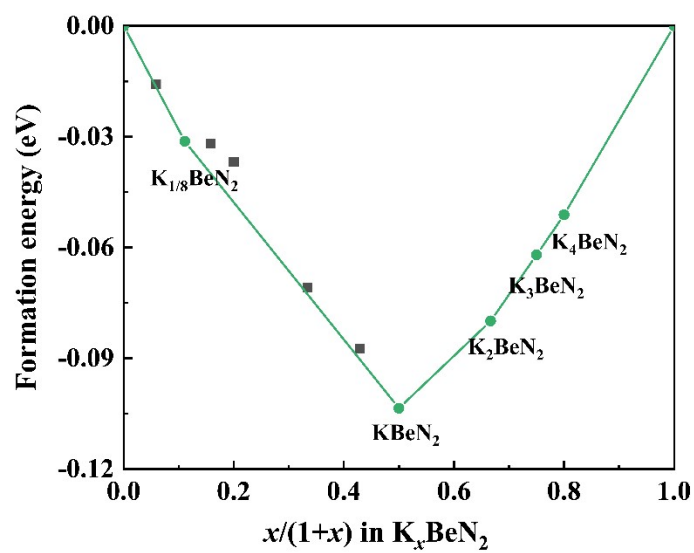

**Fig. S5.** Formation energy convex hull of  $K_xBeN_2$  structures at different K ion concentrations.

### The carrier mobilities of $\alpha$ -2D-BeN<sub>2</sub>

The calculated details of all parameters mentioned above in the “**Calculation of carrier mobility**” part are listed in the Table S1. For electron carriers, the effective mass is 0.96/0.61  $m_e$  with high mobility of  $0.55/6.6 \times 10^4 \text{ cm}^2\text{V}^{-1}\text{s}^{-1}$  along direction- $a/-b$ , respectively. With comparison, the hole carrier has close effective mass of -0.60/-0.81  $m_e$  with relatively smaller mobility of  $1.3/8.3 \times 10^3 \text{ cm}^2\text{V}^{-1}\text{s}^{-1}$ , along direction- $a/-b$ , respectively. The highest value is lower than that of graphene ( $3.4 \times 10^5 \text{ cm}^2\text{V}^{-1}\text{s}^{-1}$ )<sup>10</sup> and  $h$ -BeN<sub>2</sub> ( $3.4 \times 10^5 \text{ cm}^2\text{V}^{-1}\text{s}^{-1}$ )<sup>4</sup>, but higher than that of BP monolayer ( $2.6 \times 10^4 \text{ cm}^2\text{V}^{-1}\text{s}^{-1}$ )<sup>5</sup>.

**Table. S1.** The calculated 2D elastic moduli ( $C_{2D}$ ), effective mass ( $m^*$ ), average effective mass ( $m_d$ ), deformation potential constant ( $E_l$ ), and carrier mobility of 2D structures ( $\mu_{2D}$ ) along the transport direction (axial  $a$  and  $b$ , here). The “ $m_e$ ” is the rest mass of a static electron.

| Carrier type | $C_{2D}$ (N/m) | $m^*$ ( $m_e$ ) | $m_d$ ( $m_e$ ) | $E_l$ (eV) | $\mu_{2D}$ ( $\text{cm}^2\text{V}^{-1}\text{s}^{-1}$ ) |
|--------------|----------------|-----------------|-----------------|------------|--------------------------------------------------------|
| Hole_a       | 153.8          | -0.600          | 0.698           | -2.414     | 1342                                                   |
| Electron_a   | 153.8          | 0.963           | 0.764           | -0.896     | 5546                                                   |
| Hole_b       | 145.4          | -0.813          | 0.698           | -0.813     | 8256                                                   |
| Electron_b   | 145.4          | 0.606           | 0.764           | -0.318     | 66143                                                  |



## References

1. E. Cadelano, P. L. Palla, S. Giordano and L. Colombo, Elastic properties of hydrogenated graphene, *Phys. Rev. B*, 2010, **82**, 235414.
2. J. Bardeen and W. Shockley, Deformation Potentials and Mobilities in Non-Polar Crystals, *Phys. Rev.*, 1950, **80**, 72-80.
3. Y. Cai, G. Zhang and Y.-W. Zhang, Polarity-Reversed Robust Carrier Mobility in Monolayer MoS<sub>2</sub> Nanoribbons, *J. Am. Chem. Soc.*, 2014, **136**, 6269-6275.
4. C. Zhang and Q. Sun, A Honeycomb BeN<sub>2</sub> Sheet with a Desirable Direct Band Gap and High Carrier Mobility, *J. Phys. Chem. Lett.*, 2016, **7**, 2664-2670.
5. J. Qiao, X. Kong, Z.-X. Hu, F. Yang and W. Ji, High-mobility transport anisotropy and linear dichroism in few-layer black phosphorus, *Nat. Commun.*, 2014, **5**, 4475.
6. Z. Zhuo, X. Wu and J. Yang, Two-dimensional silicon crystals with sizable band gaps and ultrahigh carrier mobility, *Nanoscale*, 2018, **10**, 1265-1271.
7. B. Peng, H. Zhang, H. Shao, Y. Xu, R. Zhang and H. Zhu, The Electronic, Optical, and Thermodynamic Properties of Borophene from First-Principles Calculations, *J. Mater. Chem. C*, 2016, **4**, 3592-3598.
8. S. Saha, T. P. Sinha and A. Mookerjee, Electronic Structure, Chemical Bonding, and Optical Properties of Paraelectric BaTiO<sub>3</sub>, *Phys. Rev. B*, 2000, **62**, 8828-8834.
9. J. K. Nørskov, J. Rossmeisl, A. Logadottir, L. Lindqvist, J. R. Kitchin, T. Bligaard and H. Jónsson, Origin of the Overpotential for Oxygen Reduction at a Fuel-Cell Cathode, *J. Phys. Chem. B*, 2004, **108**, 17886-17892.
10. J. Chen, J. Xi, D. Wang and Z. Shuai, Carrier Mobility in Graphyne Should Be Even Larger than That in Graphene: A Theoretical Prediction, *J. Phys. Chem. Lett.*, 2013, **4**, 1443-1448.
